# Supplementary material
Source: PubMed Central journal article supplement (PMC9903596)

## Supplemental Data Tables and Figures

|                                                                                                                                             |               |
|---------------------------------------------------------------------------------------------------------------------------------------------|---------------|
| Supplemental Table 1: Number of patients and study sites per country                                                                        | <b>Page 2</b> |
| Supplemental Table 2: Comparison of symptoms at presentation                                                                                | <b>Page 3</b> |
| Supplemental Table 3: Association of Comorbidities and Clinical Presentation with Mortality                                                 | <b>Page 4</b> |
| Supplemental Table 4: Laboratory abnormalities identified on hospital day 1 significantly associated with mortality                         | <b>Page 5</b> |
| Supplemental Table 5 Complete list of hospital diagnoses and complications including odds ratio for mortality of each diagnosis             | <b>Page 6</b> |
| Supplemental Table 6. Mortality rates for factors significantly associated with mortality in adjusted logistic regression stratified by age | <b>Page 7</b> |
| Supplemental Figure 1. Hospital mortality rate stratified by age                                                                            | <b>Page 8</b> |
| Supplemental Figure 2. Hospital mortality stratified by age and MIS-C diagnosis                                                             | <b>Page 9</b> |

**Supplemental Table 1: Number of patients and study sites per country**

| <b>Country</b>    | <b>Number of enrolled patients (% of total)</b> | <b>Total Number of Centres</b> |
|-------------------|-------------------------------------------------|--------------------------------|
| USA               | 110 (20%)                                       | 19                             |
| Canada            | 2 (0·4%)                                        | 2                              |
| Puerto Rico       | 2 (0·4%)                                        | 1                              |
| Ireland           | 2 (0·4%)                                        | 1                              |
| Italy             | 48 (8·6%)                                       | 2                              |
| Portugal          | 7 (1·3%)                                        | 1                              |
| Spain             | 11 (2%)                                         | 1                              |
| <b>Turkey</b>     | 23 (4·1%)                                       | 2                              |
| <b>Argentina</b>  | 29 (5·2%)                                       | 8                              |
| <b>Bolivia</b>    | 2 (0·4%)                                        | 8                              |
| Chile             | 39 (7%)                                         | 11                             |
| <b>Colombia</b>   | 137 (25%)                                       | 20                             |
| <b>Costa Rica</b> | 17 (3·1%)                                       | 11                             |
| <b>Honduras</b>   | 29 (5·2%)                                       | 1                              |
| <b>Mexico</b>     | 16 (2·9%)                                       | 1                              |
| <b>Peru</b>       | 83 (15%)                                        | 2                              |
| Uruguay           | 0                                               | 2                              |
| <b>Panama</b>     | 0                                               | 1                              |

Total number of centres includes those that had IRB approval and screened but did not have patients included for this analysis. Countries considered low or middle income countries using the World Bank categories are noted in **bold**.

**Supplemental Table 2: Comparison of symptoms at presentation, including symptom category and components of each category, between children who survived and those who died.**

| Symptoms                         | All       | Survived<br>(n=501) | Died<br>(n=56) |
|----------------------------------|-----------|---------------------|----------------|
| Lower Respiratory                | 262 (47%) | 221 (44%)           | 41 (73%)       |
| Cough                            | 209 (38%) | 176 (35%)           | 33 (59%)       |
| Wheeze                           | 63 (11%)  | 50 (10%)            | 13 (23%)       |
| Retractions                      | 164 (29%) | 128 (26%)           | 36 (64%)       |
| Upper Respiratory                | 165 (30%) | 154 (31%)           | 11 (20%)       |
| Sore Throat                      | 91 (16%)  | 87 (17%)            | 4 (7.1%)       |
| Rhinorrhoea                      | 95 (17%)  | 86 (17%)            | 9 (16%)        |
| Ear Pain                         | 6 (1%)    | 6 (1.2%)            | 0              |
| Systemic                         | 469 (84%) | 423 (84%)           | 46 (82%)       |
| Fever                            | 428 (77%) | 392 (78%)           | 36 (64%)       |
| Fatigue                          | 310 (56%) | 280 (56%)           | 30 (54%)       |
| Gastrointestinal                 | 327 (59%) | 304 (61%)           | 23 (41%)       |
| Abdominal Pain                   | 241 (43%) | 226 (45%)           | 15 (27%)       |
| Vomiting                         | 238 (43%) | 223 (45%)           | 15 (27%)       |
| Diarrhoea                        | 187 (34%) | 174 (35%)           | 13 (23%)       |
| Neurologic                       | 214 (38%) | 190 (38%)           | 24 (43%)       |
| Headache                         | 114 (20%) | 108 (22%)           | 6 (11%)        |
| Confusion                        | 107 (19%) | 87 (17%)            | 20 (36%)       |
| Seizure                          | 48 (8.6%) | 40 (8%)             | 8 (14%)        |
| Mucocutaneous                    | 208 (37%) | 198 (40%)           | 10 (18%)       |
| Rash                             | 147 (26%) | 142 (28%)           | 5 (8.9%)       |
| Conjunctivitis                   | 118 (21%) | 116 (23%)           | 2 (3.6%)       |
| Skin Ulcers                      | 8 (1.4%)  | 7 (1.4%)            | 1 (1.8%)       |
| “Strawberry” Tongue/Oral Lesions | 64 (12%)  | 63 (13%)            | 1 (1.8%)       |
| Red Hands/Feet                   | 105 (19%) | 99 (20%)            | 6 (11%)        |
| Non-Specific                     | 299 (54%) | 263 (52%)           | 36 (64%)       |
| Chest Pain                       | 44 (7.9%) | 41 (8.2%)           | 3 (5.4%)       |
| Myalgias                         | 131 (24%) | 124 (25%)           | 7 (13%)        |
| Arthralgias                      | 49 (8.8%) | 46 (9.2%)           | 3 (5.4%)       |
| Shortness of Breath              | 192 (34%) | 160 (32%)           | 32 (57%)       |
| Lymphadenopathy, general         | 53 (9.5%) | 50 (10%)            | 3 (5.4%)       |
| Lymphadenopathy, cervical        | 49 (9%)   | 46 (9.2%)           | 3 (5.4%)       |
| Bleeding                         | 14 (2.5%) | 9 (1.8%)            | 5 (8.9%)       |

Data are n (%)

**Supplemental Table 3: Association of Comorbidities and Clinical Presentation with Mortality. Odds ratios for mortality calculated using univariate logistic regression**

| Variable                                 | Mortality with Variable | Mortality without Variable | Odds Ratio  | 95% CI     |
|------------------------------------------|-------------------------|----------------------------|-------------|------------|
| <b>Comorbidities</b>                     |                         |                            |             |            |
| Cardiac                                  | 10/43 (23%)             | 46/514 (9%)                | <b>3·08</b> | 1·43, 6·66 |
| Pulmonary (not asthma)                   | 8/32 (25%)              | 48/525 (9·1%)              | <b>3·31</b> | 1·41, 7·78 |
| Asthma                                   | 5/44 (11%)              | 51/513 (9·9%)              | 1·16        | 0·44, 3·08 |
| Renal                                    | 3/22 (14%)              | 53/535 (9·9%)              | 1·44        | 0·41, 5·01 |
| Liver                                    | 4/9 (44%)               | 52/548 (9·5%)              | <b>7·63</b> | 1·99, 29·3 |
| Neurologic                               | 9/58 (16%)              | 47/499 (9·4%)              | 1·77        | 0·82, 3·82 |
| Malignancy                               | 7/20 (35%)              | 49/537 (9·1%)              | <b>5·36</b> | 2·04, 14·1 |
| Hematologic                              | 5/18 (28%)              | 51/539 (9·5%)              | <b>3·68</b> | 1·26, 10·7 |
| Obesity                                  | 4/74 (5·4%)             | 52/483 (11%)               | 0·47        | 0·17, 1·35 |
| Diabetes                                 | 1/11 (9·1%)             | 55/491 (10%)               | 0·89        | 0·11, 7·11 |
| Malnutrition                             | 10/36 (28%)             | 46/521 (8·8%)              | <b>3·97</b> | 1·80, 8·75 |
| >1 Comorbidity                           | 26/119 (22%)            | 30/438 (6·9%)              | <b>3·80</b> | 2·15, 6·73 |
| No Comorbidities                         | 15/272 (5·5%)           | 41/285 (14%)               | <b>0·35</b> | 0·19, 0·64 |
| <b>Clinical Presentation</b>             |                         |                            |             |            |
| Known COVID Exposure                     | 23/240 (9·6%)           | 33/315 (10%)               | 0·91        | 0·52, 1·59 |
| Ward Admission Pre-ICU                   | 29/249 (12%)            | 23/278 (8·3%)              | 1·46        | 0·82, 2·60 |
| Fever (>38·3°C) at Admission             | 6/112 (5·4%)            | 49/430 (11%)               | 0·44        | 0·18, 1·06 |
| Admission O <sub>2</sub> Saturation <94% | 21/116 (18%)            | 34/417 (8·2%)              | <b>2·49</b> | 1·38, 4·49 |
| Dehydration at Admission                 | 10/87 (11%)             | 46/468 (9·8%)              | 1·19        | 0·58, 2·46 |
| Delayed Admission Capillary Refill       | 25/141 (18%)            | 18/229 (7·9%)              | <b>2·53</b> | 1·32, 4·82 |
| <b>Presenting Symptoms</b>               |                         |                            |             |            |
| Lower Respiratory                        | 41/262 (16%)            | 15/295 (5·1%)              | <b>3·46</b> | 1·87, 6·42 |
| Upper Respiratory                        | 11/165 (6·7%)           | 45/392 (11%)               | 0·55        | 0·28, 1·09 |
| Systemic                                 | 46/469 (9·8%)           | 10/88 (11%)                | 0·85        | 0·41, 1·75 |
| Gastrointestinal                         | 23/327 (7%)             | 33/230 (14%)               | <b>0·45</b> | 0·26, 0·79 |
| Neurologic                               | 24/214 (11%)            | 32/343 (9·3%)              | 1·23        | 0·70, 2·15 |
| Mucocutaneous                            | 10/208 (4·8%)           | 46/349 (13%)               | <b>0·33</b> | 0·16, 0·67 |
| Non-Specific                             | 36/299 (12%)            | 20/258 (7·8%)              | 1·63        | 0·92, 2·89 |

Statistically significant results in **bold**.

**Supplemental Table 4: Laboratory abnormalities identified on hospital day 1 significantly\* associated with mortality. Percentage calculated based on entire cohort.**

|                              | <b>All</b><br>(n=557) | <b>Survived</b><br>(n=501) | <b>Died</b><br>(n=56) |
|------------------------------|-----------------------|----------------------------|-----------------------|
| pH                           | 7.36 (7.29, 7.40)     | 7.36 (7.30, 7.41)          | 7.31 (7.21, 7.39)     |
| BUN (mg/dL)                  | 16 (9, 30)            | 15 (9, 28)                 | 19.5 (10, 39)         |
| Sodium (mEq/L)               | 136 (133, 139)        | 136 (133, 139)             | 138 (135, 142)        |
| Lactate (mmol/L)             | 2 (1.3, 3.3)          | 1.9 (1.2, 3.2)             | 2.5 (1.7, 4.6)        |
| Procalcitonin > 2 ng/mL      | 65 (12%)              | 63 (12.6%)                 | 2 (3.6%)              |
| C-Reactive Protein (4 mg/dL) | 10 (2.3, 20.1)        | 10 (2.4, 20.5)             | 4.9 (0.9, 10)         |
| Fibrinogen (mg/dL)           | 450 (274, 639)        | 465 (279, 645)             | 248 (168, 446)        |
| BNP >60 pg/mL                | 129 (23%)             | 122 (24%)                  | 7 (13%)               |

Data are median (IQR) or n (%)

\* p<0.05 using Wilcoxon rank-sum or chi-square test

**Abbreviations:** BUN = blood urea nitrogen; BNP = brain natriuretic peptide

**SI Conversion Factors:** To convert BUN, multiply by 0.357. To convert C-reactive protein, multiply by 10

**Supplemental Table 5 Complete list of hospital diagnoses and complications including odds ratio for mortality of each diagnosis in univariate logistic regression analysis.**

| Diagnosis/Complication      | Prevalence | Mortality      |                   | Odds Ratio  | 95% CI     |
|-----------------------------|------------|----------------|-------------------|-------------|------------|
|                             |            | With Diagnosis | Without Diagnosis |             |            |
| Viral Pneumonia/Pneumonitis | 183 (33%)  | 27/183 (15%)   | 29/373 (7.8%)     | <b>2.05</b> | 1.18, 3.58 |
| Bacterial Pneumonia         | 113 (20%)  | 22/113 (19%)   | 34/443 (7.7%)     | <b>2.91</b> | 1.62, 5.21 |
| ARDS                        | 157 (28%)  | 38/157 (24%)   | 18/400 (4.5%)     | <b>6.78</b> | 3.73, 12.3 |
| Pneumothorax                | 15 (2.7%)  | 10/15 (67%)    | 46/541 (8.5%)     | <b>21.5</b> | 7.06, 65.6 |
| Pleural Effusion            | 79 (14%)   | 10/79 (13%)    | 46/478 (9.6%)     | 1.36        | 0.66, 2.82 |
| Bronchiolitis               | 26 (4.7%)  | 2/26 (7.7%)    | 54/531 (10%)      | 0.74        | 0.17, 3.20 |
| Meningitis                  | 29 (5.2%)  | 5/29 (17%)     | 51/528 (9.7%)     | 1.95        | 0.72, 5.33 |
| Seizure                     | 53 (9.5%)  | 12/53 (23%)    | 44/504 (8.7%)     | <b>3.06</b> | 1.50, 6.25 |
| Stroke                      | 19 (3.4%)  | 8/19 (42%)     | 48/491 (8.9%)     | <b>7.42</b> | 2.85, 19.3 |
| Heart Failure               | 86 (15%)   | 23/86 (27%)    | 33/471 (7%)       | <b>4.85</b> | 2.67, 8.78 |
| Myocarditis/Cardiomyopathy  | 101 (18%)  | 8/101 (7.9%)   | 48/456 (11%)      | 0.73        | 0.33, 1.60 |
| Arrhythmia                  | 39 (7%)    | 10/39 (26%)    | 46/518 (8.9%)     | <b>3.54</b> | 1.62, 7.72 |
| Cardiac Arrest              | 56 (10%)   | 47/56 (84%)    | 9/501 (1.8%)      | <b>285</b>  | 108, 754   |
| Bacteraemia                 | 68 (12%)   | 22/68 (32%)    | 33/488 (6.8%)     | <b>6.59</b> | 3.55, 12.2 |
| Coagulopathy                | 98 (18%)   | 21/98 (21%)    | 35/459 (7.6%)     | <b>3.30</b> | 1.83, 5.98 |
| Anaemia                     | 198 (36%)  | 34/198 (17%)   | 22/359 (6.1%)     | <b>3.18</b> | 1.80, 5.60 |
| Rhabdomyolysis              | 6 (1.1%)   | 0/6 (0%)       | 56/550 (10%)      | -           | -          |
| Acute Kidney Injury         | 88 (16%)   | 24/88 (27%)    | 32/469 (6.8%)     | <b>5.12</b> | 2.84, 9.24 |
| Gastroenteritis             | 11 (2%)    | 4/11 (36%)     | 52/546 (9.5%)     | <b>5.43</b> | 1.54, 19.2 |
| Pancreatitis                | 13 (2.3%)  | 3/13 (23%)     | 53/543 (9.8%)     | 2.77        | 0.74, 10.4 |
| Acute Hepatic Injury        | 51 (9.2%)  | 11/51 (22%)    | 45/506 (8.9%)     | <b>2.82</b> | 1.35, 5.87 |
| MIS-C                       | 188 (34%)  | 6/188 (3.2%)   | 50/368 (14%)      | <b>0.21</b> | 0.09, 0.50 |

Data are n (%). Statistically significant results in **bold**.

Abbreviations: ARDS = acute respiratory distress syndrome; MIS-C = multisystem inflammatory syndrome in children

**Supplemental Table 6. Mortality rates for factors significantly associated with mortality in adjusted logistic regression stratified by age.**

| Variable                                 | <2 years old     |                  | ≥2 years old     |                  |
|------------------------------------------|------------------|------------------|------------------|------------------|
|                                          | <u>Mortality</u> |                  | <u>Mortality</u> |                  |
|                                          | With Variable    | Without Variable | With Variable    | Without Variable |
| Admission O <sub>2</sub> Saturation <94% | 8/32 (25%)       | 12/97 (12%)      | 13/84 (15%)      | 22/320 (6.9%)    |
| Pulmonary Comorbidity                    | 2/9 (22%)        | 18/125 (14%)     | 6/23 (26%)       | 30/400 (7.5%)    |
| Malnutrition                             | 5/15 (33%)       | 15/119 (13%)     | 5/21 (24%)       | 31/402 (7.7%)    |
| Lower Respiratory Symptoms               | 17/75 (23%)      | 3/59 (5.1%)      | 24/187 (13%)     | 12/236 (5.1%)    |
| Gastrointestinal Symptoms                | 5/37 (14%)       | 15/97 (15%)      | 18/290 (6.2%)    | 18/133 (14%)     |
| Mucocutaneous Symptoms                   | 2/21 (9.5%)      | 18/113 (16%)     | 8/187 (4.3%)     | 28/236 (12%)     |
| Day 1 Invasive Ventilation               | 11/40 (28%)      | 9/89 (10%)       | 17/94 (18%)      | 19/323 (5.9%)    |
| Prophylactic Anticoagulation             | 3/21 (14%)       | 17/113 (15%)     | 8/174 (4.6%)     | 28/249 (11%)     |
| IVIG                                     | 6/37 (16%)       | 14/97 (14%)      | 7/225 (3.1%)     | 29/198 (15%)     |
| Dexamethasone                            | 5/35 (14%)       | 15/99 (15%)      | 12/122 (9.8%)    | 24/301 (7.8%)    |
| Methylprednisolone                       | 5/28 (18%)       | 15/106 (14%)     | 7/192 (3.7%)     | 29/231 (13%)     |
| Viral Pneumonia                          | 15/60 (25%)      | 5/74 (6.8%)      | 12/123 (9.8%)    | 24/299 (8%)      |
| ARDS                                     | 14/42 (33%)      | 6/92 (6.5%)      | 24/115 (21%)     | 12/308 (3.9%)    |
| Bacteraemia                              | 10/28 (36%)      | 9/105 (8.6%)     | 12/40 (30%)      | 24/383 (6.3%)    |
| Acute Kidney Injury                      | 8/13 (62%)       | 12/121 (10%)     | 16/75 (21%)      | 20/348 (5.8%)    |
| Acute Liver Injury                       | 4/6 (67%)        | 16/128 (13%)     | 7/45 (16%)       | 29/378 (7.7%)    |
| MIS-C                                    | 3/20 (15%)       | 17/114 (15%)     | 3/168 (1.8%)     | 33/254 (13%)     |

**Supplemental Figure 1. Hospital mortality rate stratified by age**

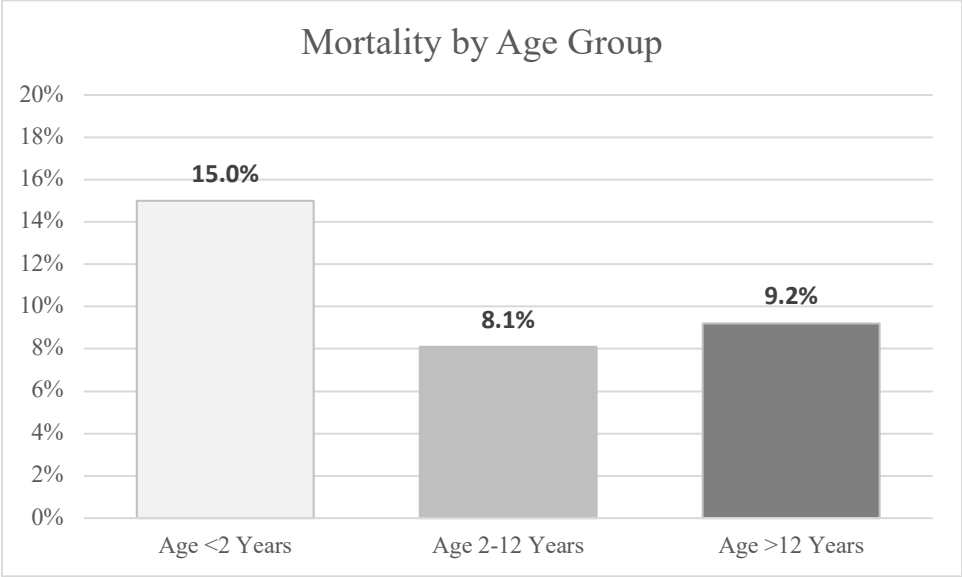



**Supplemental Figure 2: Hospital mortality rate stratified by age and a.) MIS-C or b.) No MIS-C**

**a.)**

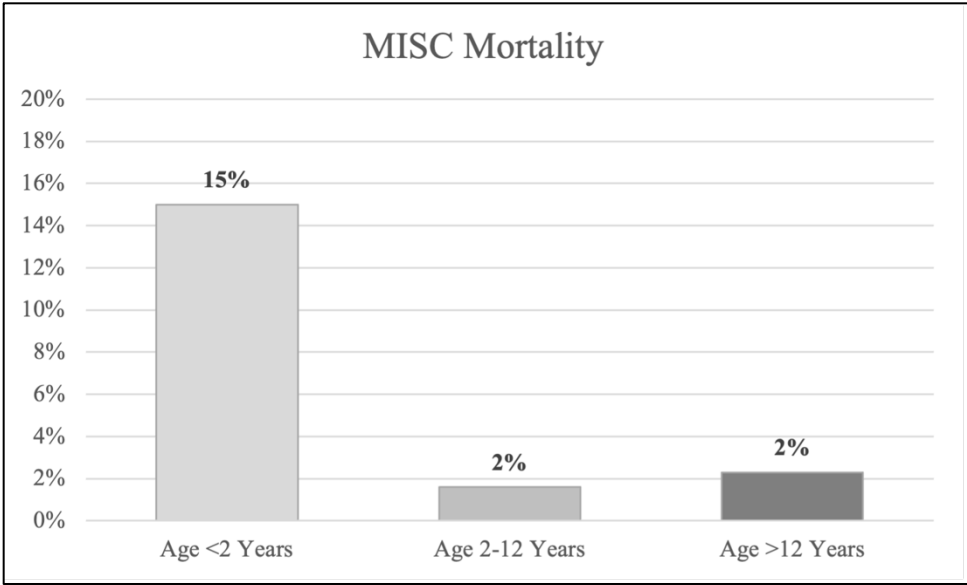

**b.)**

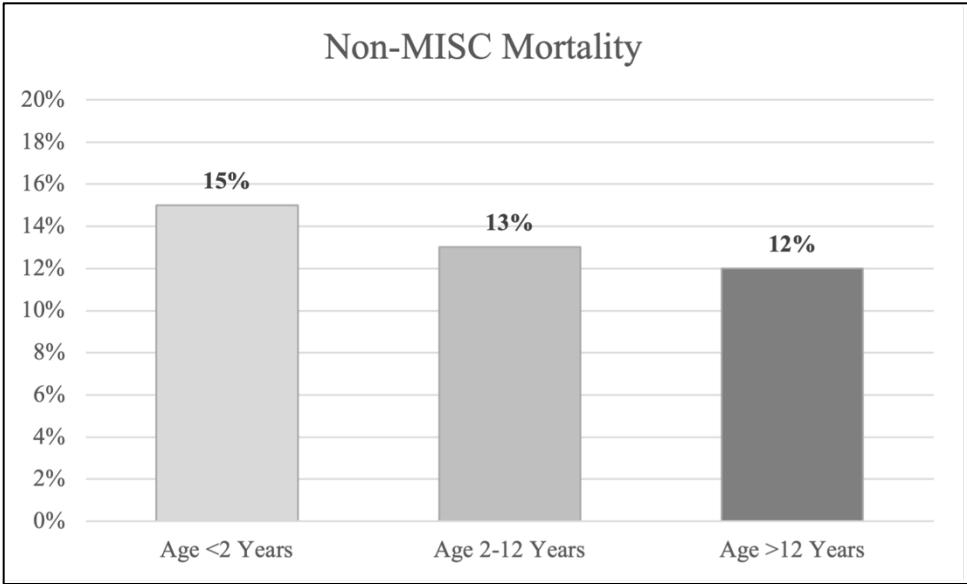

Supplement: mmc2.pdf [file mmc2.pdf]
